# Supplementary material for: Development, characterization and comparisons of targeted and non-targeted metabolomics methods
Source: PLoS One. 2018 Nov 15;13(11):e0207082. doi: 10.1371/journal.pone.0207082 (PMC6237353; doi:10.1371/journal.pone.0207082)
Supplement: S3 Table — (XLSX) [file pone.0207082.s009.xlsx]

## Sheet: S3 Table
S3 Table. Sample description and information
Sample name	Species	Tissue	Weight (g)	Extraction batch	Comments	Sample dilution
Control-Batch1	Sparus aurata	Brain	0.1046	1	QCtrain for brain	75
Control-Batch2	Sparus aurata	Brain	0.1282	2	-	75
Control-Batch3	Sparus aurata	Brain	0.1437	3	-	75
Control-Batch4	Sparus aurata	Brain	0.1123	4	-	75
Control-Batch5	Sparus aurata	Liver	0.7663	5	QCtrain for liver	75
Control-Batch6	Sparus aurata	Liver	0.7112	6	-	75
Control-Batch7	Sparus aurata	Liver	0.5825	7	-	75
Control-Batch8	Sparus aurata	Liver	0.6984	8	-	75
Control-Batch9	Sparus aurata	Liver	0.5693	9	-	75
Control-Batch10	Sparus aurata	Liver	0.4544	10	-	75
Control-Batch11	Sparus aurata	Liver	0.7313	11	-	75
Control-Batch12	Sparus aurata	Liver	0.7934	12	-	75
NIST V1-A6	Homo sapiens	Plasma	0.0291	1	Extracted and run in the same analysis sequences as brain	25
NIST V1-A7	Homo sapiens	Plasma	0.0286	2	Extracted and run in the same analysis sequences as brain	25
NIST V1-A8	Homo sapiens	Plasma	0.0288	3	Extracted and run in the same analysis sequences as brain	25
NIST V1-A9	Homo sapiens	Plasma	0.0287	4	Extracted and run in the same analysis sequences as brain	25
NIST V2-A1	Homo sapiens	Plasma	0.0281	5	Extracted and run in the same analysis sequences as liver	25
NIST V2-A2	Homo sapiens	Plasma	0.0287	6	Extracted and run in the same analysis sequences as liver	25
NIST V2-A3	Homo sapiens	Plasma	0.0289	7	Extracted and run in the same analysis sequences as liver	25
NIST V2-A4	Homo sapiens	Plasma	0.0275	8	Extracted and run in the same analysis sequences as liver	25
NIST V2-A5	Homo sapiens	Plasma	0.0283	9	Extracted and run in the same analysis sequences as liver	25
NIST V2-A6	Homo sapiens	Plasma	0.0273	10	Extracted and run in the same analysis sequences as liver	25
NIST V2-A7	Homo sapiens	Plasma	0.028	11	Extracted and run in the same analysis sequences as liver	25
NIST V2-A8	Homo sapiens	Plasma	0.0279	12	Extracted and run in the same analysis sequences as liver	25
Blank-Batch1	-	-	-	1	Extracted and run in the same analysis sequences as brain	25
Blank-Batch2	-	-	-	2	Extracted and run in the same analysis sequences as brain	25
Blank-Batch3	-	-	-	3	Extracted and run in the same analysis sequences as brain	25
Blank-Batch4	-	-	-	4	Extracted and run in the same analysis sequences as brain	25
Blank-Batch5	-	-	-	5	Extracted and run in the same analysis sequences as liver	25
Blank-Batch6	-	-	-	6	Extracted and run in the same analysis sequences as liver	25
Blank-Batch7	-	-	-	7	Extracted and run in the same analysis sequences as liver	25
Blank-Batch8	-	-	-	8	Extracted and run in the same analysis sequences as liver	25
Blank-Batch9	-	-	-	9	Extracted and run in the same analysis sequences as liver	25
Blank-Batch10	-	-	-	10	Extracted and run in the same analysis sequences as liver	25
Blank-Batch11	-	-	-	11	Extracted and run in the same analysis sequences as liver	25
Blank-Batch12	-	-	-	12	Extracted and run in the same analysis sequences as liver	25
