# Supplementary material for: Development, characterization and comparisons of targeted and non-targeted metabolomics methods
Source: PLoS One. 2018 Nov 15;13(11):e0207082. doi: 10.1371/journal.pone.0207082 (PMC6237353; doi:10.1371/journal.pone.0207082)
Supplement: S6 Table — (XLSX) [file pone.0207082.s012.xlsx]

## Sheet: S6 Table
S6 Table. The impact of stationary phase and ionization polarity on the number of features detected during orbitrap analysis (OrbiC18/HILIC +/-)
	Brain			Liver			NIST
	Tot n peaks	Tot mzCloud	Our mzCloud crit	Tot n peaks	Tot mzCloud	Our mzCloud crit	Tot n peaks	Tot mzCloud	Our mzCloud crit		Brain	Liver	NIST
C18 (+)	4939	168	56	2256	117	45	1935	87	35	HILIC % of C18	104.466	236.241	184.55
C18 (-)	2137	51	22	1080	33	15	1023	26	17	Pos % of Neg	144.93	138.609	133.417
HILIC (+)	3622	243	84	4260	303	96	2876	229	62
HILIC (-)	3770	58	8	3621	62	6	2583	39	10
Same numbers in %
C18 (+)	34.1374	32.3077	32.9412	20.1123	22.7184	27.7778	22.9892	22.8346	28.2258
C18 (-)	14.7705	9.80769	12.9412	9.62824	6.40777	9.25926	12.154	6.82415	13.7097
HILIC (+)	25.0346	46.7308	49.4118	37.9781	58.835	59.2593	34.1689	60.105	50
HILIC (-)	26.0575	11.1538	4.70588	32.2814	12.0388	3.7037	30.6879	10.2362	8.06452
